# Supplementary material
Source: PubMed Central journal article supplement (PMC3449310)

## SUPPLEMENTAL FIGURE LEGENDS

**Table 1. Animal numbers, liver weight, and liver (L): body weight (BW) ratios.** (D; DEN-initiated, S; dietary silibinin, DS; DEN-initiated/dietary silibinin), DES; DEN-initiated/dietary silibinin/EtOH.  $p < 0.05$  was considered statistically significant and denoted by \* vs S # vs D.

**Fig. 1. Silibinin feeding provided moderate hepatoprotective effects in male and female DEN-initiated mice at 24 weeks.** Liver injury was blind-scored from representative H and E (a) and Picosirius red sections (2 lobes/mouse, 5 fields/lobe) from each experimental group to generate a total liver injury score (TLIS) (b) and assessed by (c) serum alanine aminotransferase (ALT) activity, d) measures of mean area (mm<sup>2</sup>) of altered hepatic foci (AHF) and e) multiplicity of were calculated from glutathione S-transferase-placental isoform (GSTpi) immunohistochemistry. (D; DEN-initiated, S; dietary silibinin, DS; DEN-initiated/dietary silibinin), DES; DEN-initiated/dietary silibinin/EtOH.  $n \geq 5$  animals/group,  $p < .05$  S vs D, DS and DES in male and female groups, # male vs female, † DS vs D.

**Fig. 2. Liver collagen content at 48 weeks.** Representative images of sections from control (S) male and female mice and mice initiated with DEN (D) followed by dietary silibinin feeding (DS) and/or concomitant ethanol feeding (DES) at 48 wks. Sections were stained with Picosirius red to evaluate collagen deposition and combined to calculate a total liver injury score (TLIS) (Fig. 2b)

Supplemental Table 1.  
Brandon-Warner et al.

|                         | Group      | n  | Liver wt (g)  | Body wt (g)  | L:BW ratio      |
|-------------------------|------------|----|---------------|--------------|-----------------|
| <b>Male<br/>24 wk</b>   | <b>S</b>   | 9  | 1.67 ± 0.02   | 33.6 ± 0.8   | 0.050 ± 0.001   |
|                         | <b>D</b>   | 9  | 2.10 ± 0.17   | 36.9 ± 2.4   | 0.057 ± 0.002   |
|                         | <b>DS</b>  | 8  | 1.96 ± 0.14   | 37.7 ± 1.9   | 0.052 ± 0.002   |
|                         | <b>DES</b> | 14 | 2.01 ± 0.14   | 34.8 ± 0.7   | 0.057 ± 0.004   |
| <b>Female<br/>24 wk</b> | <b>S</b>   | 9  | 1.32 ± 0.04   | 23.9 ± 0.5   | 0.055 ± 0.001   |
|                         | <b>D</b>   | 9  | 1.64 ± 0.09   | 27.9 ± 0.6   | 0.059 ± 0.003   |
|                         | <b>DS</b>  | 9  | 1.14 ± 0.07   | 24.1 ± 0.4   | 0.047 ± 0.001   |
|                         | <b>DES</b> | 14 | 1.31 ± 0.06   | 26.7 ± 1.1   | 0.049 ± 0.001   |
|                         |            |    |               |              |                 |
| <b>Male<br/>48 wk</b>   | <b>S</b>   | 9  | 2.00 ± 0.07   | 41.4 ± 1.2   | 0.047 ± 0.001   |
|                         | <b>D</b>   | 8  | 2.59 ± 0.35 * | 36.3 ± 2.3 * | 0.070 ± 0.007 * |
|                         | <b>DS</b>  | 9  | 2.64 ± 0.21*  | 37.1 ± 1.3   | 0.071 ± 0.005 * |
|                         | <b>DES</b> | 14 | 3.96 ± 0.18 * | 36.5 ± 0.9 * | 0.107 ± 0.007 * |
| <b>Female<br/>48 wk</b> | <b>S</b>   | 9  | 1.44 ± 0.05   | 28.7 ± 0.7   | 0.050 ± 0.001   |
|                         | <b>D</b>   | 9  | 1.78 ± 0.14 * | 28.2 ± 0.8   | 0.063 ± 0.005 * |
|                         | <b>DS</b>  | 8  | 1.32 ± 0.11 # | 26.4 ± 0.5   | 0.050 ± 0.004 # |
|                         | <b>DES</b> | 14 | 1.33 ± 0.11   | 25.9 ± 1.6   | 0.049 ± 0.003   |

a)

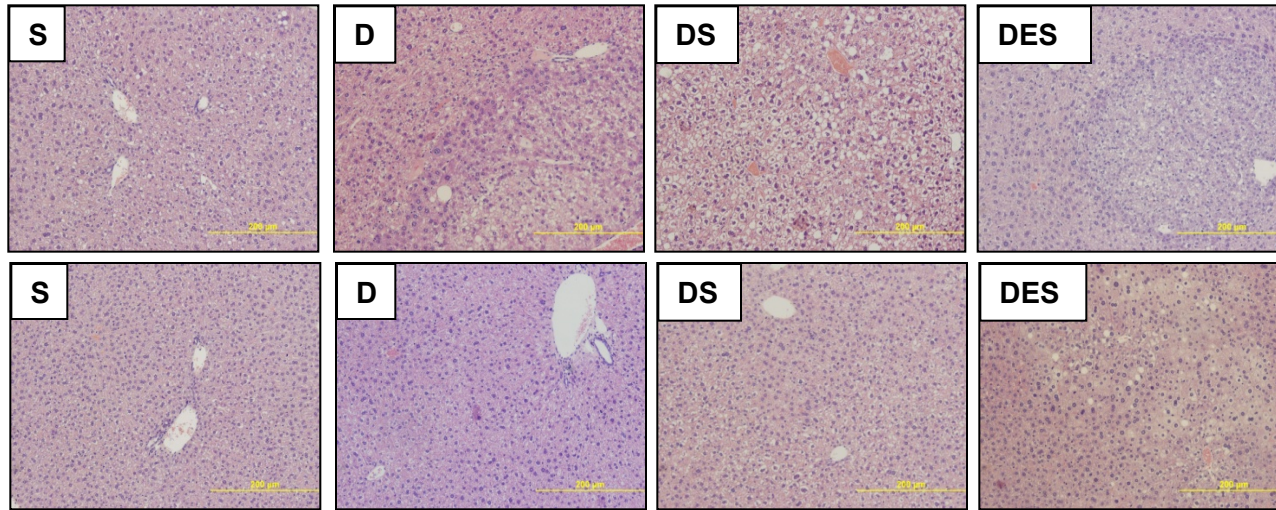

b)

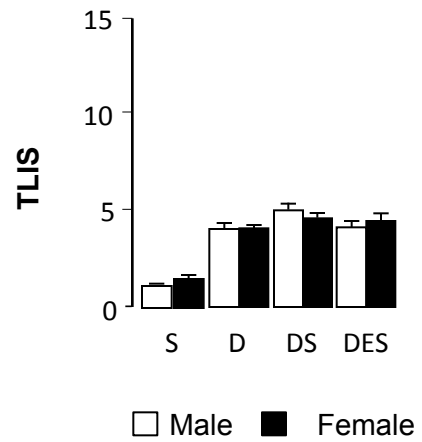

c)

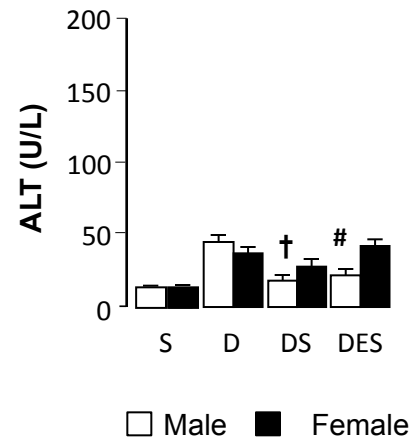

d)

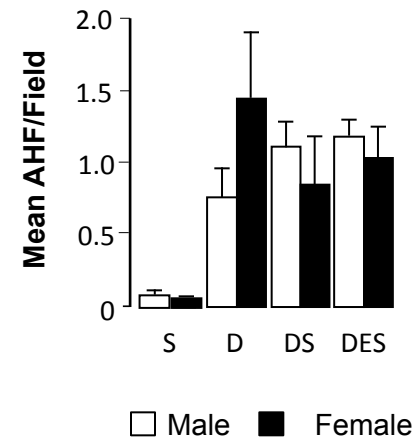

e)

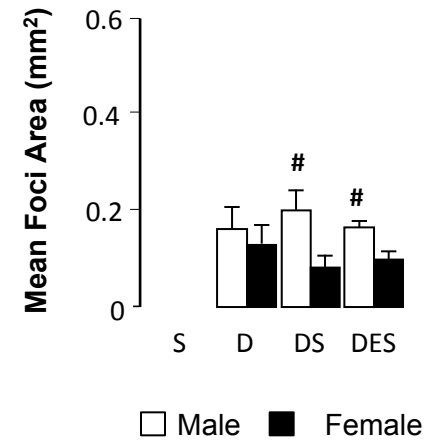

Supplemental Figure 2.  
Brandon-Warner et al.

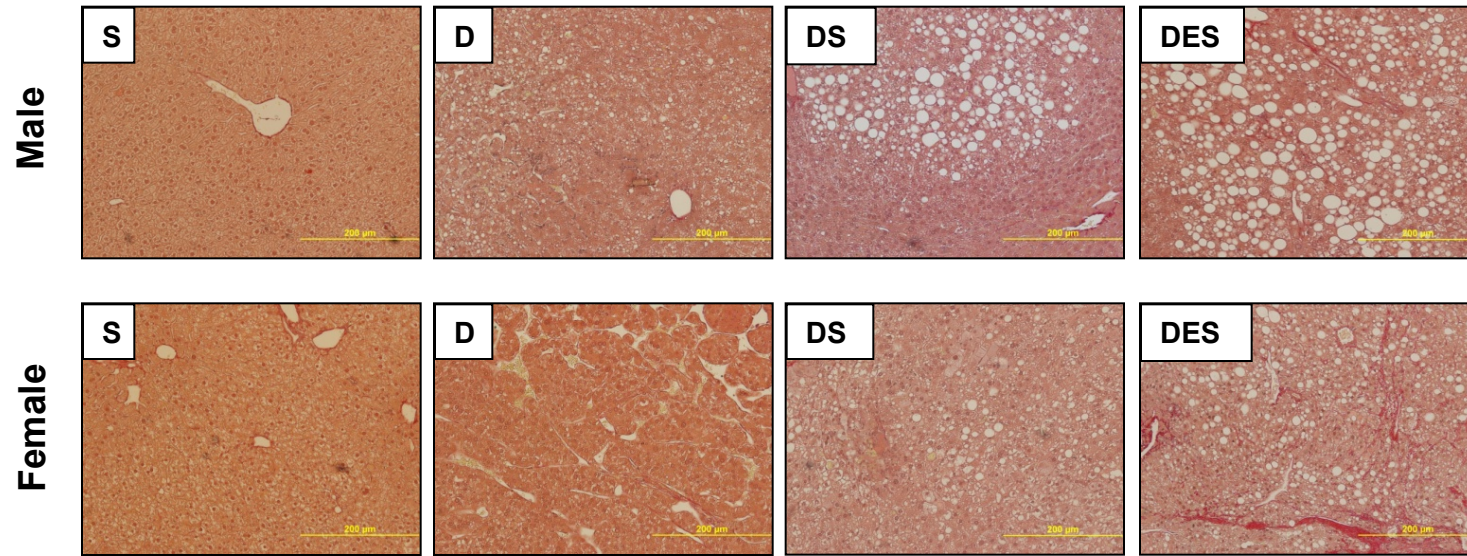

Supplement: NIHMS403536-supplement-01.pdf [file NIHMS403536-supplement-01.pdf]
